# Supplementary material for: Pregabalin in fibromyalgia - responder analysis from individual patient data
Source: BMC Musculoskelet Disord. 2010 Jul 5;11:150. doi: 10.1186/1471-2474-11-150 (PMC2906437; doi:10.1186/1471-2474-11-150)
Supplement: Additional file 4 — NNTs for weekly sleep response levels. This Excel file compares pregabalin at doses of 300-600 mg to placebo. [file 1471-2474-11-150-S4.XLS]

## Sheet: Additional file 4
Additional file 4: NNTs (with 95% confidence intervals) for weekly sleep response levels; pregabalin at doses of 300-600 mg is compared to placebo.
NS - not significant
Sleep improvement over baseline	Week	1	2	3	4	5	6	7	8	9	10	11	12
Any improvement (>0%)
	Pregabalin 300 mg	5.2 (4.2-7.0)	12 (7.5-27)	9.5 (6.5-18)	9.9 (6.6-20)	15 (8.6-73)	NS	17 (9.7-180)	NS	NS	NS	NS	NS
	Pregabalin 450 mg	4.9 (4.0-6.3)	9.9 (6.7-19)	9.3 (6.4-17)	8.0 (5.7-13)	12 (7.3-28)	11 (7.0-23)	11 (7.0-24)	12 (7.5-33)	14 (7.9-84)	9.6 (6.2-22)	NS	14 (7.6-68)
	Pregabalin 600 mg	4.4 (3.6-5.7)	6.6 (4.9-10)	8.6 (5.9-16)	8.8 (5.9-17)	NS	NS	NS	NS	NS	NS	NS	NS
At least 15%
	Pregabalin 300 mg	3.7 (3.1-4.6)	5.6 (4.3-7.8)	7.4 (5.3-12)	7.6 (5.5-13)	8.5 (5.9-15)	11 (7.2-29)	13 (7.7-41)	NS	NS	16 (8.4-311)	NS	NS
	Pregabalin 450 mg	3.4 (2.9-4.1)	4.8 (3.9-6.4)	6.8 (5.0-11)	7.0 (5.1-11)	7.1 (5.2-11)	9.3 (6.3-18)	8.0 (5.6-14)	7.9 (5.6-14)	12 (7.1-40)	7.7 (5.3-14)	11 (6.6-29)	8.9 (5.9-18)
	Pregabalin 600 mg	3.2 (2.7-3.9)	3.9 (3.2-5.0)	5.9 (4.4-9.0)	5.8 (4.4-8.8)	11 (6.7-30)	15 (8.0-127)	15 (7.9-98)	16 (8.3-204)	NS	16 (8.4-265)	NS	16 (8.3-166)
At least 30%
	Pregabalin 300 mg	4.8 (4.0-5.9)	5.9 (4.7-8.1)	8.1 (5.8-13)	7.8 (5.6-13)	7.2 (5.3-11)	9.4 (6.4-18)	9.3 (6.4-17)	10 (6.7-20)	13 (7.4-40)	13 (7.5-39)	16 (8.4-116)	14 (8.1-58)
	Pregabalin 450 mg	3.9 (3.3-4.6)	4.3 (3.6-5.4)	6.1 (4.7-8.7)	5.6 (4.4-7.7)	5.6 (4.4-7.7)	7.1 (5.3-11)	6.8 (5.1-10)	7.0 (5.2-10)	8.1 (5.6-15)	8.6 (5.8-16)	9.6 (6.3-21)	7.0 (5.1-11)
	Pregabalin 600 mg	3.9 (3.3-7.8)	3.7 (3.1-4.6)	4.6 (3.7-6.2)	5.3 (4.1-7.4)	6.7 (4.9-11)	8.5 (5.8-11)	8.3 (5.7-15)	9.1 (6.1-18)	11 (6.7-28)	9.3 (6.2-19)	16 (8.7-162)	10 (6.6-22)
At least 50%
	Pregabalin 300 mg	11 (8.4-15)	8.9 (6.9-13)	8.5 (6.5-12)	9.1 (6.8-14)	9.2 (6.8-14)	9.0 (6.6-14)	11 (7.5-18)	11 (7.7-21)	17 (9.7-78)	15 (9.0-44)	15 (9.1-47)	13 (8.2-30)
	Pregabalin 450 mg	7.2 (5.9-9.0)	5.5 (4.6-6.9)	6.3 (5.1-8.3)	6.1 (4.9-8.1)	6.0 (4.8-8.0)	7.8 (5.9-12)	7.1 (5.5-10)	8.1 (6.0-12)	12 (7.5-25)	9.0 (6.4-16)	8.0 (5.8-13)	8.4 (6.0-14)
	Pregabalin 600 mg	9.0 (7.1-12)	5.5 (4.5-7.0)	5.3 (4.3-6.8)	5.7 (4.6-7.7)	6.5 (5.0-9.2)	7.7 (5.7-12)	7.8 (5.8-12)	7.8 (5.7-12)	13 (8.4-36)	9.9 (6.8-18)	9.2 (6.5-16)	8.4 (6.1-14)
At least 70%									19 (13-42)
	Pregabalin 300 mg	24 (17-37)	20 (14-31)	15 (11-22)	20 (13-37)	16 (11-27)	14 (10-24)	17 (12-30)	14 (9.8-23)	18 (11-39)	21 (13-57)	20 (13-51)	24 (14-82)
	Pregabalin 450 mg	19 (14-28)	11 (9.0-15)	10 (8.0-14)	10 (7.8-14)	11 (8.7-17)	11 (8.6-17)	15 (11-25)	14 (9.7-27)	17 (11-35)	16 (11-32)	14 (9.8-26)	20 (13-55)
	Pregabalin 600 mg	23 (17-39)	11 (8.8-16)	8.7 (6.9-12)	11 (8.1-17)	9.6 (7.3-14)	12 (8.8-21)	12 (8.7-20)	14 (9.7-27)	15 (10-28)	12 (8.6-20)	14 (9.8-26)	14 (9.4-24)
